# Supplementary material
Source: Research Square preprint supplement (doi:10.21203/rs.3.rs-9509588/v1)
Supplement: Supplementary file 1 [file a89a2c47b34a68b6bf4f8327.docx]

**Supplementary File**

**Thiazolidin-4-one Derivatives Against Glioblastoma: Mcl-1 Inhibition at the Cost of Selectivity**

Farah Chafika Kaouche *, Nahide Gulsah Deniz*, Cigdem Sayil, Gülsima Arik, Evren Onay Ucar, Nazli Ardaand Abdelkader Chouaih

**
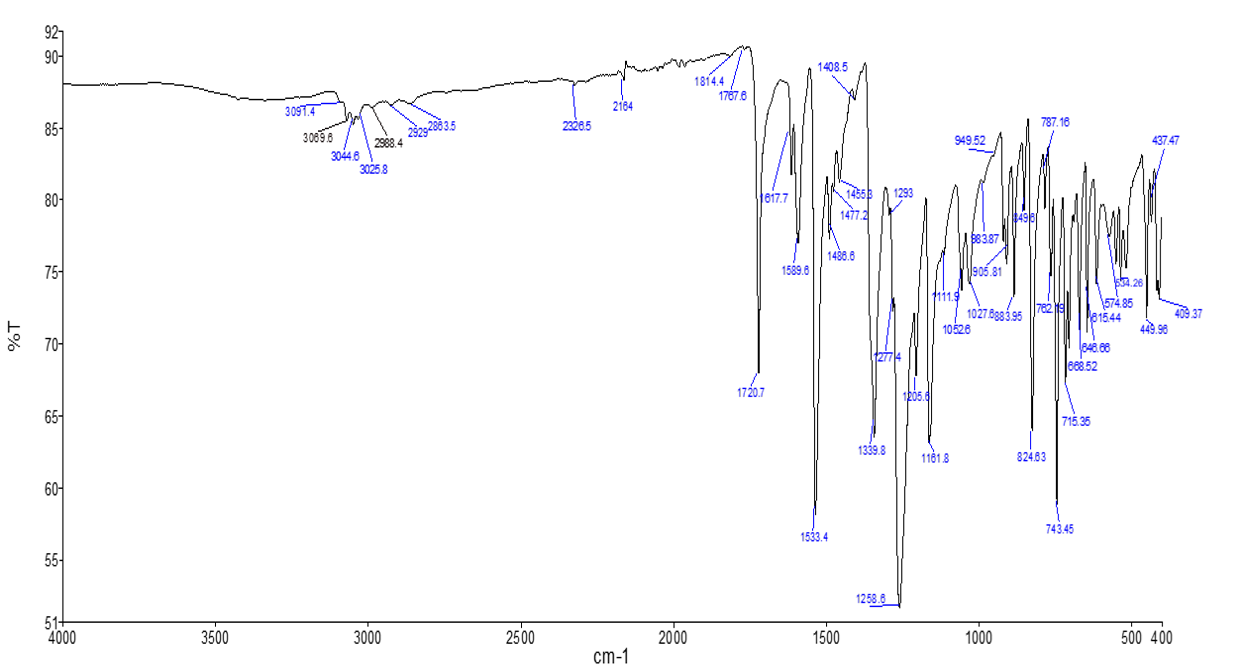
**

**S1.** FT-IR analysis of compound **7a**

**
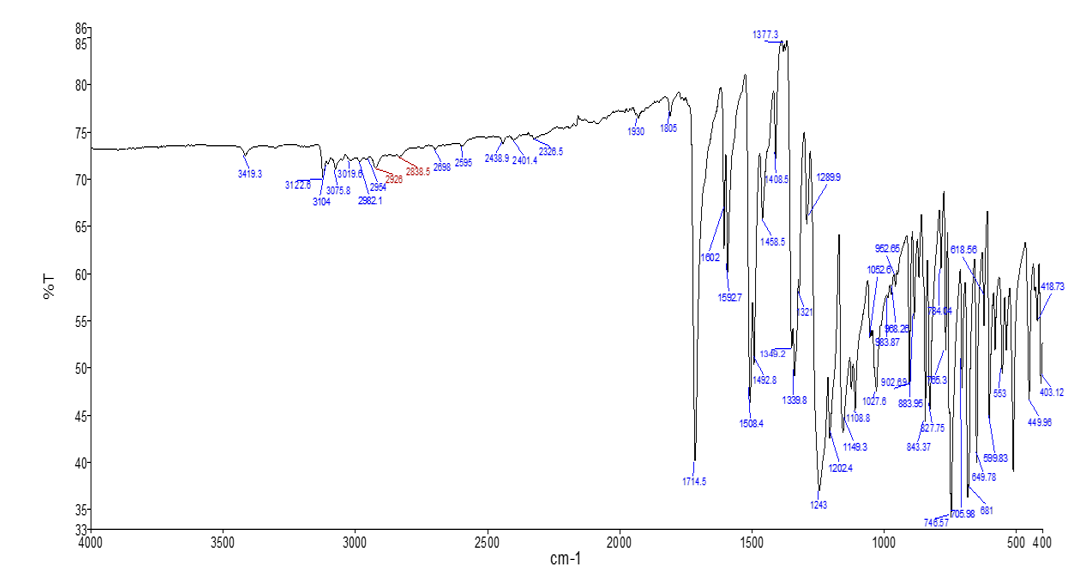
**

**S2.** FT-IR analysis of compound **7b**

**
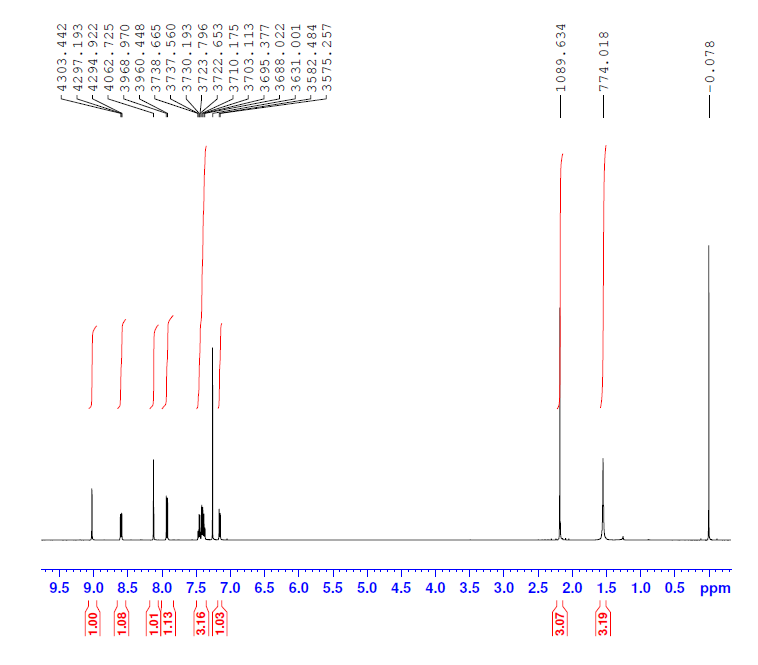
**

**S3.** 1H NMR Spectra of compound **7a**


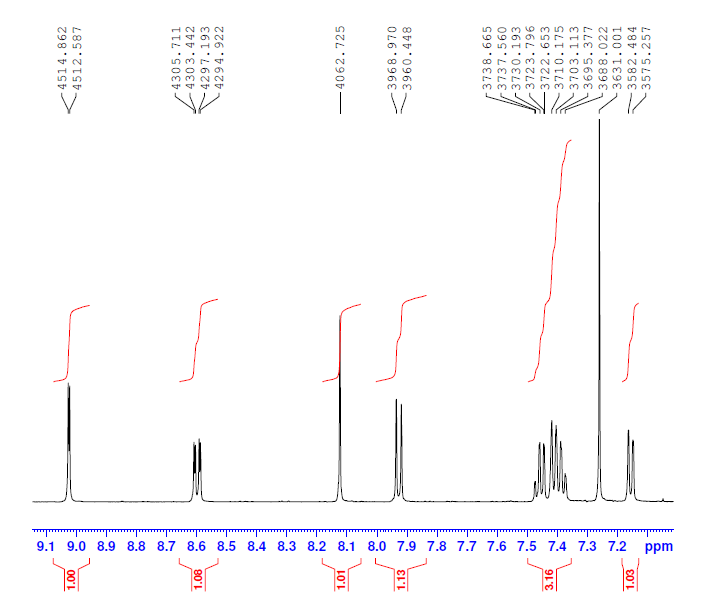


**S4.** 1H NMR Spectra of compound **7a** (between δ 7.0-9.1 ppm)


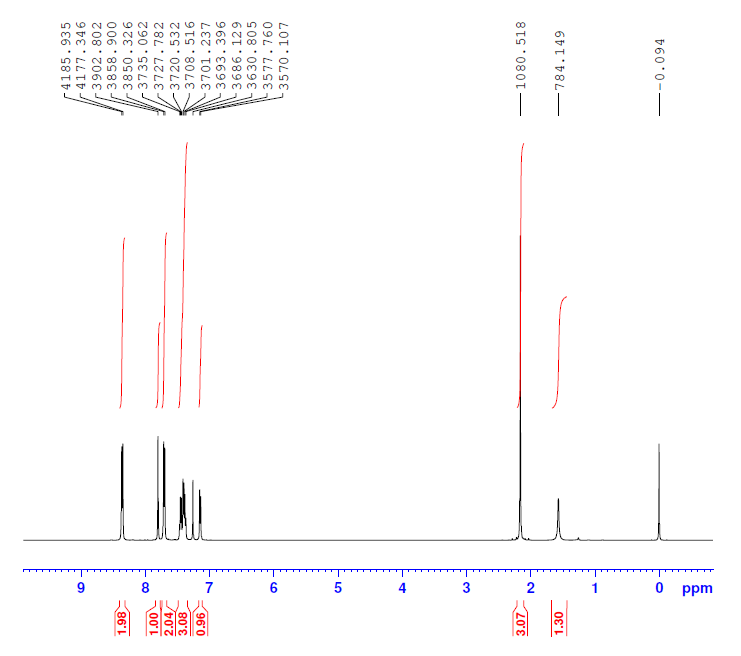


**S5.** 1H NMR Spectra of compound **7b**


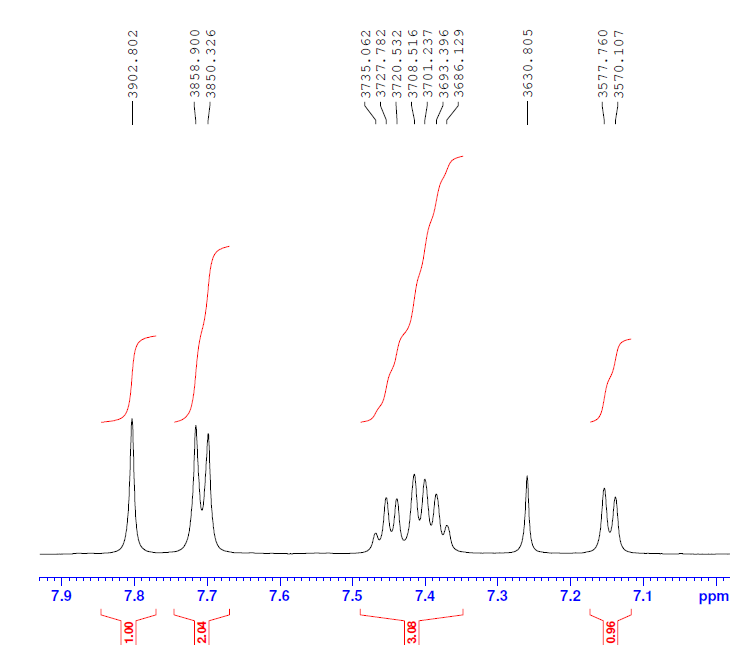


**S6.** 1H NMR Spectra of compound **7b** (between δ 7.0-8.00 ppm)


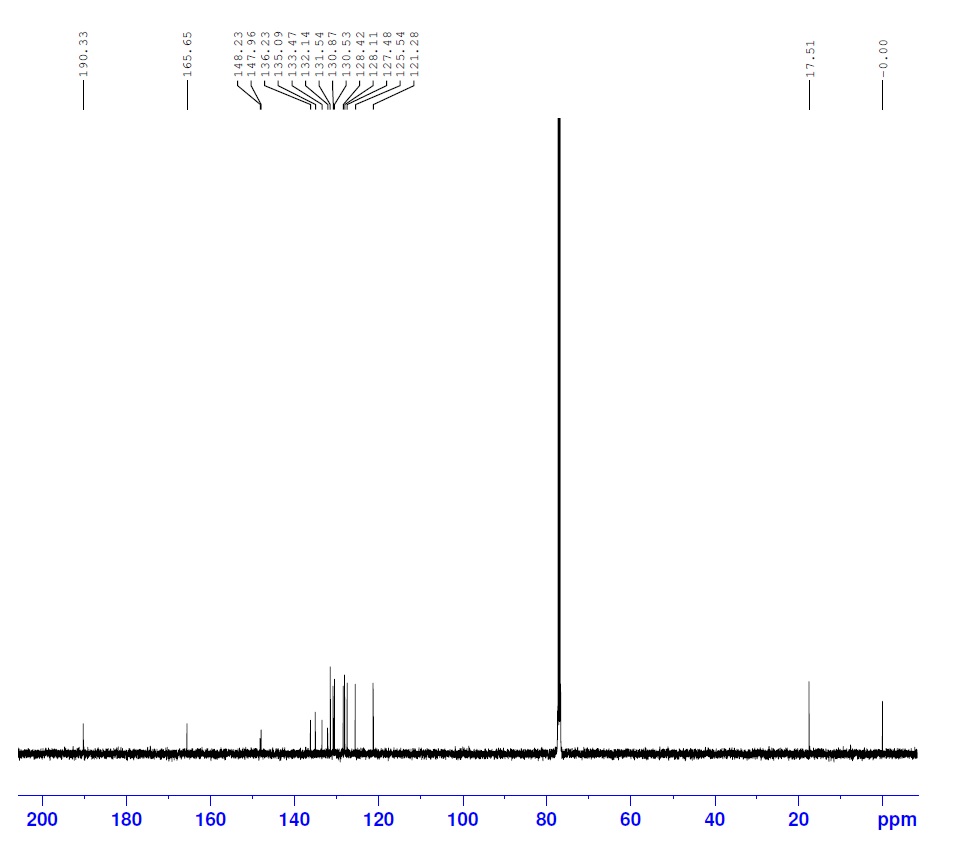


**S7.** 13C NMR Spectra of compound **7a**


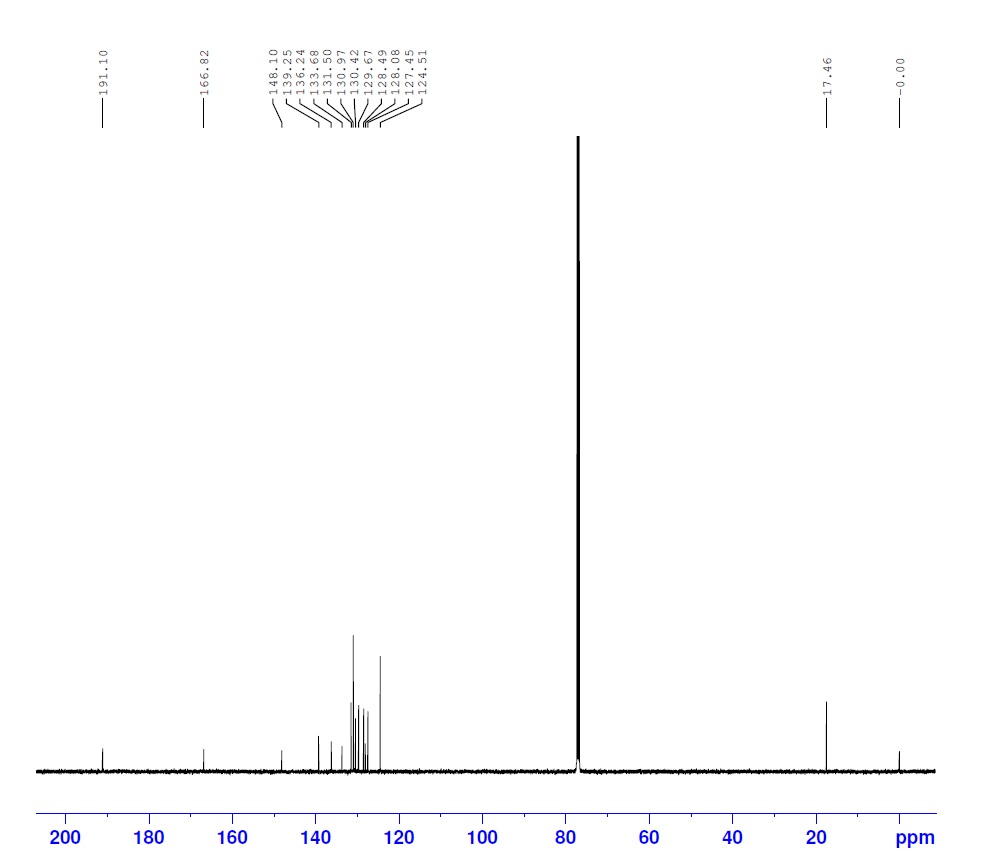


**S8.** 13C NMR Spectra of compound **7b**

**
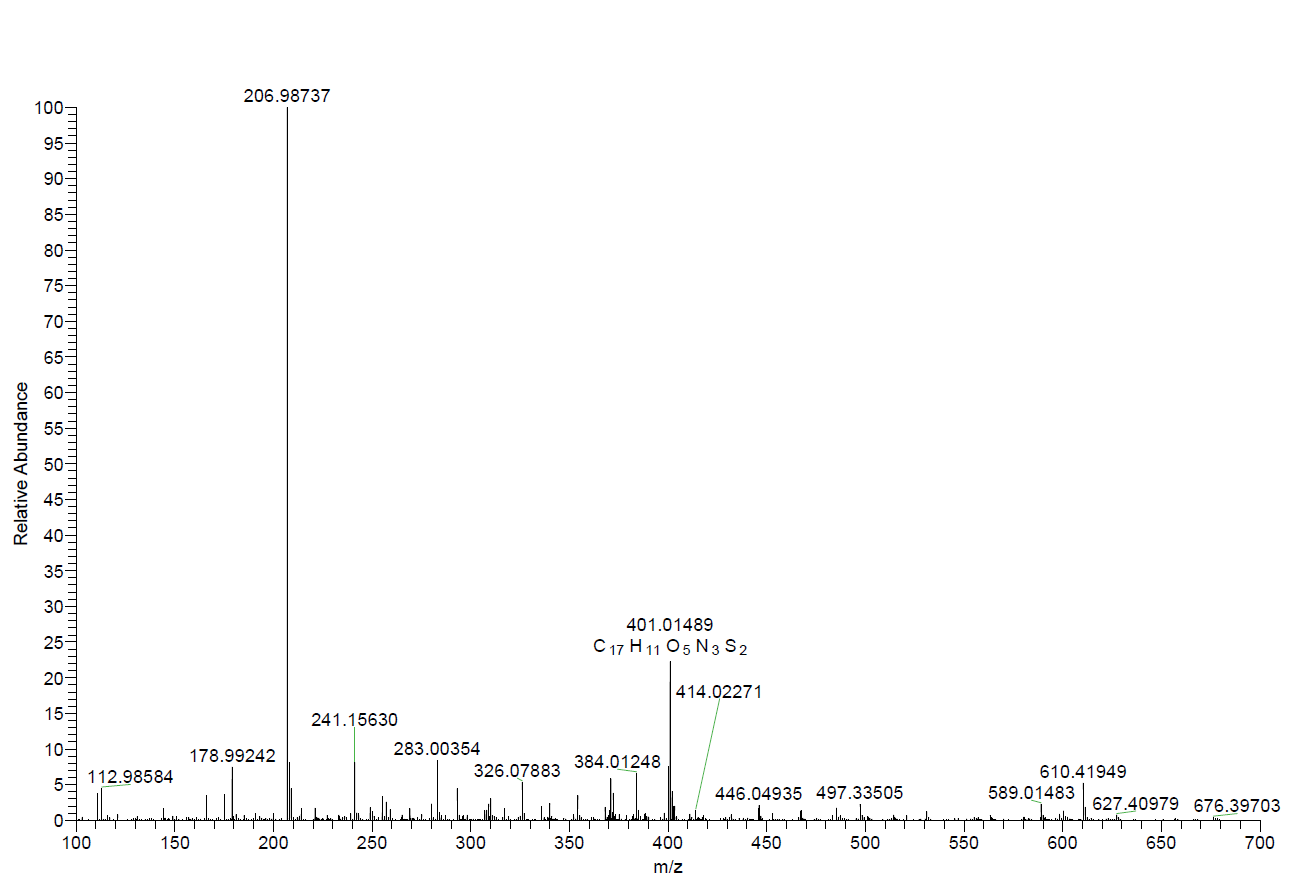
**

**S9.** HRMS[-ESI] Spectra of compound **7a**

**
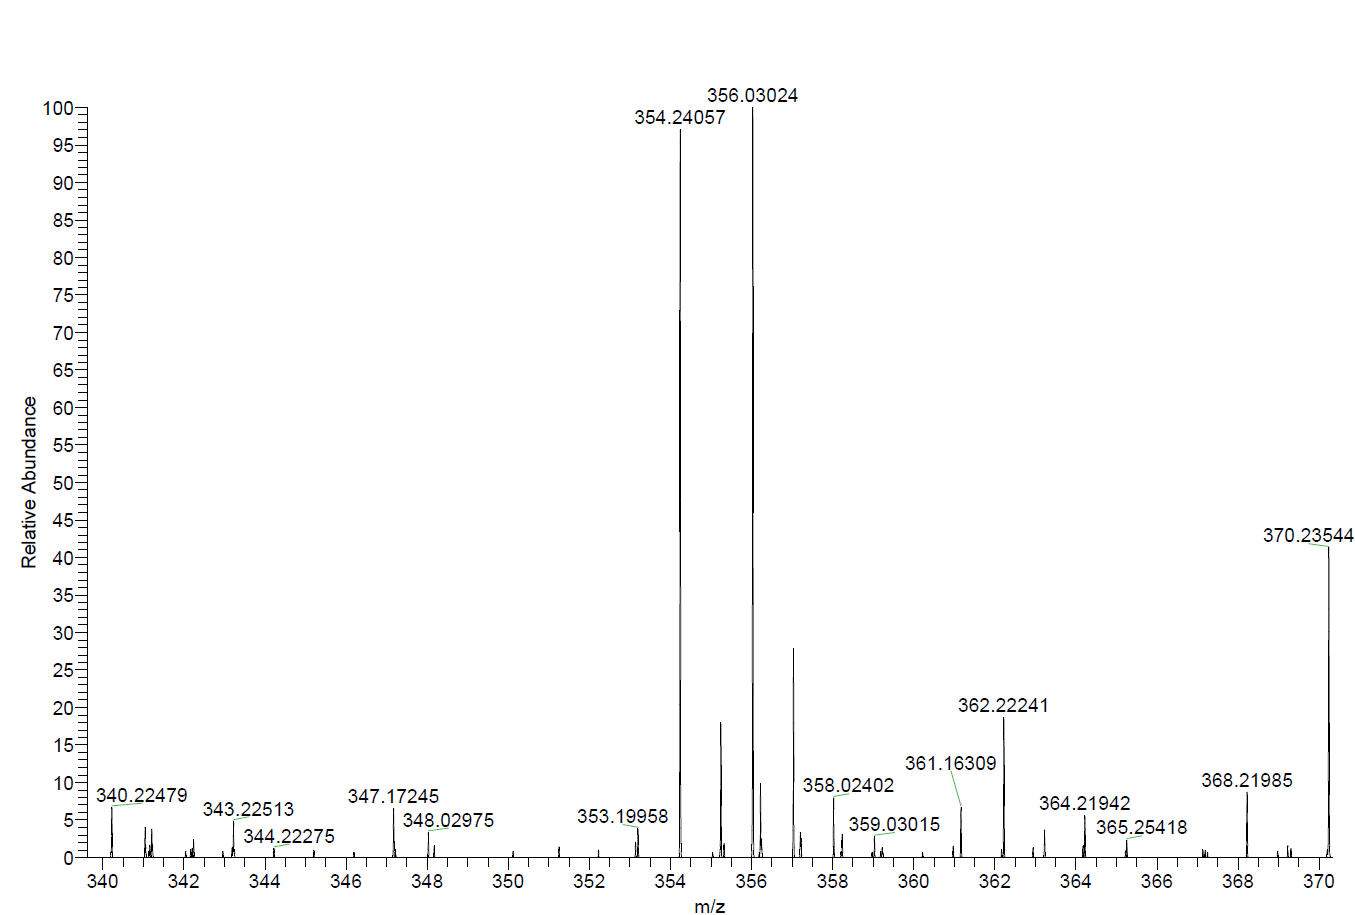
**

**S10.** HRMS[-ESI] Spectra of compound **7b**
